# Supplementary material
Source: PubMed Central journal article supplement (PMC7357183)
Supplement: kfaa055_supplementary_data.pdf [file kfaa055_supplementary_data.pdf]

## Supplemental Material

### **Diesel exhaust extract exposure induces neuronal toxicity by disrupting autophagy**

Lisa M. Barnhill<sup>1,2</sup>, Sataree Khuansuwan<sup>1</sup>, Daniel Juarez<sup>1</sup>, Hiromi Murata<sup>2</sup>, Jesus A. Araujo<sup>2,3</sup>, \*Jeff M. Bronstein<sup>1,2</sup>

<sup>1</sup>Department of Neurology, University of California Los Angeles, Los Angeles, CA United States

<sup>2</sup>Molecular Toxicology IDP, University of California Los Angeles, Los Angeles, CA United States

<sup>3</sup>Division of Cardiology, Department of Medicine, University of California Los Angeles, Los Angeles, CA United States

Correspondence to:

Jeff M. Bronstein MD, PhD

David Geffen School of Medicine

Department of Neurology

710 Westwood Plaza

Los Angeles, CA 90095

Email: [jbronste@mednet.ucla.edu](mailto:jbronste@mednet.ucla.edu)

| Analyte                       | DEP Sample | (Sample/% Recovery) |
|-------------------------------|------------|---------------------|
| Phenanthrene                  | 132.66     | 142.46              |
| Anthracene                    | 0.00       |                     |
| Fluoranthene                  | 403.88     | 420.58              |
| Acephenanthrylene             | 0.00       |                     |
| Pyrene                        | 172.41     | 191.23              |
| Benzo(GH)fluoranthene         | 106.21     | 93.23               |
| Cyclopenta(cd)pyrene          | 0.00       |                     |
| Benz(a)anthracene             | 0.00       |                     |
| Chrysene                      | 94.05      | 93.86               |
| 1-Methylchrysene              | 0.00       |                     |
| Retene                        | 0.00       |                     |
| Benzo(b)fluoranthene          | 0.00       |                     |
| Benzo(k)fluoranthene          | 0.00       |                     |
| Benzo(j)fluoranthene          | 0.00       |                     |
| Benzo(e)pyrene                | 0.00       |                     |
| Benzo(a)pyrene                | 0.00       |                     |
| Perylene                      | 0.00       |                     |
| Indeno(1,2,3-cd)pyrene        | 0.00       |                     |
| Benzo(GH)perylene             | 0.00       |                     |
| Dibenz(ah)anthracene          | 0.00       |                     |
| Picene                        | 0.00       |                     |
| Coronene                      | 0.00       |                     |
| Dibenzo(ae)pyrene             | 0.00       |                     |
| 17A(H)-22,29,30-Trisnorhopane | 0.00       |                     |
| 17A(H)-21B(H)-30-Norhopane    | 0.00       |                     |
| 17A(H)-21B(H)-Hopane          | 0.00       |                     |
| 22S-Homohopane                | 0.00       |                     |
| 22R-Homohopane                | 0.00       |                     |
| 22S-Bishomohopane             | 0.00       |                     |
| 22R-Bishomohopane             | 0.00       |                     |
| 22S-Trishomohopane            | 0.00       |                     |
| 22R-Trishomohopane            | 0.00       |                     |
| AAA-20S-C27-Cholestane        | 0.00       |                     |
| ABB-20R-C27-Cholestane        | 0.00       |                     |
| AAA-20R-C27-Cholestane        | 0.00       |                     |
| ABB-20R-C28-Ergostane         | 0.00       |                     |
| ABB-20S-C28-Ergostane         | 0.00       |                     |
| ABB-20R-C29-Sitostane         | 0.00       |                     |
| ABB-20S-C29-Sitostane         | 0.00       |                     |
| Undecane                      | 0.00       |                     |
| Dodecane                      | 0.00       |                     |
| Tridecane                     | 0.00       |                     |
| Tetradecane                   | 0.00       |                     |
| Pentadecane                   | 0.00       |                     |
| Hexadecane                    | 1040.07    | 956.30              |
| Norpristane                   | 0.00       |                     |
| Heptadecane                   | 538.56     | 632.34              |
| Pristane                      | 0.00       |                     |
| Octadecane                    | 901.18     | 969.01              |
| Phytane                       | 352.18     | 381.31              |
| Nonadecane                    | 1243.17    | 1295.51             |
| Eicosane                      | 1269.96    | 1223.59             |
| Heneicosane                   | 1060.36    | 943.80              |
| Docosane                      | 696.48     | 619.64              |
| Tricosane                     | 364.64     | 373.49              |
| Tetracosane                   | 202.20     | 197.27              |
| Pentacosane                   | 234.87     | 237.70              |
| Hexacosane                    | 141.03     | 142.77              |
| Heptacosane                   | 229.29     | 230.00              |
| Octacosane                    | 411.57     | 413.31              |
| Nonacosane                    | 629.88     | 615.96              |

| Analyte                             | DEP Sample | (Sample/% Recovery) |
|-------------------------------------|------------|---------------------|
| Triacotane                          | 1017.15    | 1011.69             |
| Hentriacontane                      | 1167.64    | 1117.89             |
| Dotriacontane                       | 1556.55    | 1479.89             |
| Tritriacontane                      | 1369.05    | 1289.37             |
| Tettriacontane                      | 1317.22    | 1290.38             |
| Pentatriacontane                    | 1030.87    | 995.72              |
| Hexatriacontane                     | 819.04     | 809.41              |
| Heptatriacontane                    | 714.54     | 712.97              |
| Octatriacontane                     | 683.50     | 706.90              |
| Nonatriacontane                     | 667.22     | 682.30              |
| Tetracontane                        | 726.53     | 719.76              |
| Pentadecylcyclohexane               | 0.00       |                     |
| Hexadecylcyclohexane                | 0.00       |                     |
| Heptadecylcyclohexane               | 0.00       |                     |
| Octadecylcyclohexane                | 0.00       |                     |
| Nonadecylcyclohexane                | 0.00       |                     |
| Squalane                            | 0.00       |                     |
| Hexanoic acid                       | 0.00       |                     |
| Octanoic acid                       | 0.00       |                     |
| Decanoic acid                       | 254.57     | 232.48              |
| Dodecanoic acid                     | 604.51     | 602.10              |
| Tetradecanoic acid                  | 890.44     | 846.02              |
| Pentadecanoic acid                  | 1101.10    | 1101.10             |
| Hexadecanoic acid                   | 2919.70    | 2212.40             |
| Heptadecanoic acid                  | 778.85     | 778.85              |
| Octadecanoic acid                   | 2958.56    | 2241.16             |
| Nonadecanoic acid                   | 317.64     | 317.64              |
| Pinonic acid                        | 0.00       |                     |
| Palmitoleic acid                    | 0.00       |                     |
| Oleic acid                          | 0.00       |                     |
| Linoleic acid                       | 0.00       |                     |
| Linolenic acid                      | 0.00       |                     |
| Eicosanoic acid                     | 192.51     | 186.78              |
| Heneicosanoic acid                  | 0.00       |                     |
| Docosanoic acid                     | 0.00       |                     |
| Tricosanoic acid                    | 0.00       |                     |
| Tetracosanoic acid                  | 0.00       |                     |
| Pentacosanoic acid                  | 0.00       |                     |
| Hexacosanoic acid                   | 0.00       |                     |
| Heptacosanoic acid                  | 0.00       |                     |
| Octacosanoic acid                   | 0.00       |                     |
| Nonacosanoic acid                   | 0.00       |                     |
| Triacotanoic acid                   | 0.00       |                     |
| Dehydroabietic acid                 | 0.00       |                     |
| 7-oxodehydroabietic acid            | 0.00       |                     |
| Phthalic acid                       | 8192.84    | 6957.83             |
| Isophthalic acid                    | 2451.30    | 1949.96             |
| Terephthalic acid                   | 1335.29    | 1080.77             |
| 1,2,4-Benzenetricarboxylic acid     | 10195.07   | 11391.14            |
| 1,2,3-Benzenetricarboxylic acid     | 608.17     | 585.29              |
| 1,3,5-Benzenetricarboxylic acid     | 0.00       |                     |
| 1,2,4,5-Benzenetetracarboxylic acid | 10553.16   | 32794.16            |
| Methylphthalic acid                 | 3635.63    | 3084.18             |
| Succinic acid                       | 0.00       |                     |
| Glutaric acid                       | 0.00       |                     |
| Adipic acid                         | 0.00       |                     |
| Pimelic acid                        | 0.00       |                     |
| Suberic acid                        | 0.00       |                     |
| Azelaic acid                        | 0.00       |                     |
| Sebacic acid                        | 0.00       |                     |

**Supplemental Table 1: DEPe component analysis-** Compound quantities are given in ng/40uL. % recovery is quantified using a spiked sample of known concentration and each compound yield is adjusted for % recovery.
